# Supplementary material for: Faecal haemoglobin concentration influences risk prediction of interval cancers resulting from inadequate colonoscopy quality: analysis of the Taiwanese Nationwide Colorectal Cancer Screening Program
Source: HighWire-hosted journal article supplement (doi:10.1136/gutjnl-2015-310256), 2015-10-29

## Supplementary File

This supplementary file has been provided by the authors to give readers additional information about their work.

Supplement to: Chiu SYH, Chuang SL, LS Chen SLS, *et al.* **“Fecal Hemoglobin Concentration Influences Risk Prediction of Interval Cancers Resulting From Inadequate Colonoscopy Quality: Analysis of Taiwanese Nationwide Colorectal Cancer Screening Program”**

**Supplementary table 1** Severity of histology in association with FHbC of colorectal neoplasm that detected at index colonoscopy

| <b>FHbC<br/>(µg Hb/g feces)</b> | <b>Subjects with<br/>non-advanced<br/>adenoma only, n</b> | <b>PPV for<br/>non-advanced<br/>adenoma only, %<br/>(95%CI)</b> | <b>Subjects with<br/>advanced<br/>adenoma, n</b> | <b>PPV for<br/>advanced<br/>adenoma, %<br/>(95%CI)</b> | <b>Subjects<br/>with<br/>CRC, n</b> | <b>PPV for CRC,<br/>% (95%CI)</b> |
|---------------------------------|-----------------------------------------------------------|-----------------------------------------------------------------|--------------------------------------------------|--------------------------------------------------------|-------------------------------------|-----------------------------------|
| 20-49                           | 3,956                                                     | 25.5<br>(23.9-27.1)                                             | 1,398                                            | 9.0<br>(7.4-10.6)                                      | 304                                 | 2.0<br>(0.4-3.5)                  |
| 50-99                           | 2,165                                                     | 24.9<br>(22.8-27.0)                                             | 1,005                                            | 11.6<br>(9.5-13.7)                                     | 283                                 | 3.3<br>(1.2-5.4)                  |
| 100-149                         | 875                                                       | 23.8<br>(20.6-27.1)                                             | 512                                              | 14.0<br>(10.7-17.2)                                    | 183                                 | 5.0<br>(1.8-8.2)                  |
| ≥150                            | 2,183                                                     | 19.9<br>(18.1-21.8)                                             | 1,737                                            | 15.9<br>(14.0-17.7)                                    | 1,190                               | 10.9<br>(9.0-12.7)                |
| NA                              | 578                                                       | -                                                               | 229                                              | -                                                      | 807                                 | -                                 |

FHbC: fecal hemoglobin concentration; PPV: positive predictive value

**Supplementary table 2** Staging details of interval cancers (IC) after colonoscopy and comparison with screening detected cancers in this study

| <b>AJCC stage</b> | <b>IC, N (%)</b> | <b>Screening detected cancers<sup>*</sup>, N (%)</b> |
|-------------------|------------------|------------------------------------------------------|
| 0                 | 9 (8.6)          | 239 (14.4)                                           |
| I                 | 22 (21.0)        | 595 (35.9)                                           |
| II                | 36 (34.3)        | 339 (20.5)                                           |
| III               | 24 (22.9)        | 384 (23.2)                                           |
| IV                | 14 (13.2)        | 99 (6.0)                                             |
| Total             | 105 (100)        | 1,656 (100)                                          |
| NA                | 57               | 385                                                  |

<sup>\*</sup>: Screening detected CRC confined to those who received complete colonoscopy as confirmatory exam in the first round of Taiwanese Nationwide Screening Program within the same time frame.

NA: not available due to missing at least one item required for AJCC VI TNM staging system

**Supplementary table 3** Anatomical distribution of ICs after colonoscopy and comparison with screening detected cancers in this study

| <b>Location</b>       | <b>IC, N (%)</b> | <b>Screening detected cancers<sup>*</sup>, N (%)</b> |
|-----------------------|------------------|------------------------------------------------------|
| <b>Proximal colon</b> | <b>57(39.0)</b>  | <b>423 (31.3)</b>                                    |
| Cecum                 | 10 (6.8)         | 66 (4.9)                                             |
| Ascending colon       | 35 (24.0)        | 202 (14.9)                                           |
| Hepatic flexure       | 1 (0.7)          | 43 (3.2)                                             |
| Transverse colon      | 11 (7.5)         | 112 (8.3)                                            |
| <b>Distal colon</b>   | <b>89 (61.0)</b> | <b>927 (68.7)</b>                                    |
| Descending colon      | 5 (3.4)          | 132 (9.8)                                            |
| Sigmoid colon         | 41 (28.1)        | 661 (49.0)                                           |
| Rectum                | 43 (29.5)        | 134 (9.9)                                            |
| <b>Total</b>          | <b>146</b>       | <b>1,350</b>                                         |
| Not specified         | 16               | 691                                                  |

\*: Screening detected CRC confined to those who received colonoscopy as the confirmatory exam in the first round of Taiwanese Nationwide Screening Program within the same time frame

The OR of proximally located IC in reference to screening detected cancer was 1.24 (95% CI = 1.00-1.55).

**Supplementary Table 4** The results of cross validation

| Index colonoscopy findings | Derivation data set |                   | Validation data set |                   | Test result                 |
|----------------------------|---------------------|-------------------|---------------------|-------------------|-----------------------------|
|                            | Total subjects, n   | Colonoscopy IC, n | Total subjects, n   | Colonoscopy IC, n | Predicted colonoscopy IC, n |
| Non-advanced adenoma       | 5,185               | 28                | 2,627               | 19                | 15.5                        |
| Advanced adenoma           | 2,730               | 19                | 1,295               | 6                 | 7.8                         |
| Negative finding           | 12,064              | 59                | 6,068               | 31                | 29.7                        |
| Total                      | 19,979              | 106               | 9,990               | 56                | 53.0                        |

P=0.76 comparing the result of predicted number of colonoscopy IC estimated from the testing set and the actual colonoscopy IC in the validation set by Chi-square test.

**Supplementary table 5** Association of various risk factors and IC after colonoscopy in all subjects that received colonoscopy in Taiwanese Nationwide Screening program from 2004 to 2009

| Risk factors                                                                | Whole cohort        |                        | Subjects with negative colonoscopy |                        |
|-----------------------------------------------------------------------------|---------------------|------------------------|------------------------------------|------------------------|
|                                                                             | Univariate analysis | Multivariate analysis  | Univariate analysis                | Multivariate analysis  |
|                                                                             | Crude RR<br>(95%CI) | Adjusted RR<br>(95%CI) | Crude RR<br>(95%CI)                | Adjusted RR<br>(95%CI) |
| <b>Age</b>                                                                  |                     |                        |                                    |                        |
| 60–69 vs. 50–59 years                                                       | 1.71 (1.33-2.19)    | 1.55 (1.19-2.01)       | 1.86 (1.33-2.59)                   | 1.62 (1.14-2.30)       |
| <b>Gender</b>                                                               |                     |                        |                                    |                        |
| Male vs. female                                                             | 1.15 (0.90-1.46)    | ---                    | 1.16 (0.83-1.61)                   | ---                    |
| <b>Fecal hemoglobin concentration (<math>\mu\text{g Hb/g feces}</math>)</b> |                     |                        |                                    |                        |
| 20-49                                                                       | 1.00                | 1.00                   | 1.00                               | 1.00                   |
| 50-99                                                                       | 1.28 (0.89-1.84)    | 1.34 (0.92-1.97)       | 1.35 (0.85-2.15)                   | 1.44 (0.88-2.37)       |
| 100-149                                                                     | 2.20 (1.46-3.30)    | 2.17 (1.40-3.35)       | 2.28 (1.34-3.86)                   | 2.17 (1.21-3.92)       |
| $\geq 150$                                                                  | 2.20 (1.62-2.99)    | 2.41(1.74-3.34)        | 1.96 (1.30-2.95)                   | 2.33 (1.50-3.61)       |
| <b>Adenoma detection rate</b>                                               |                     |                        |                                    |                        |
| >30%                                                                        | 1.00                | 1.00                   | 1.00                               | 1.00                   |

| Risk factors                                      | Whole cohort        |                       | Subjects with negative colonoscopy |                       |
|---------------------------------------------------|---------------------|-----------------------|------------------------------------|-----------------------|
|                                                   | Univariate analysis | Multivariate analysis | Univariate analysis                | Multivariate analysis |
|                                                   | Crude RR (95%CI)    | Adjusted RR (95%CI)   | Crude RR (95%CI)                   | Adjusted RR (95%CI)   |
| 15%-30%                                           | 1.26 (0.87-1.82)    | 1.34 (0.90-2.01)      | 1.65 (0.91-2.99)                   | 1.63 (0.85-3.13)      |
| <15%                                              | 2.08 (1.25-3.46)    | 2.40 (1.40-4.14)      | 2.44 (1.16-5.10)                   | 2.46 (1.11-5.44)      |
| <b>Cecal intubation (incomplete vs. complete)</b> | 1.70 (1.29-2.24)    | 1.76 (1.33-2.32)      | 1.48 (1.02-2.14)                   | 1.44 (0.99-2.10)      |
| <b>Index colonoscopic findings</b>                |                     |                       |                                    |                       |
| No adenoma                                        | 1.00                | 1.00                  | -                                  | -                     |
| Non-advanced adenoma only                         | 1.54 (1.17-2.04)    | 1.73 (1.29-2.33)      | -                                  | -                     |
| Advanced adenoma                                  | 2.29 (1.59-3.30)    | 2.20 (1.51-3.21)      | -                                  | -                     |

Ambient temperature and FIT kit brand were included in the analyses, and both univariate analyses revealed no significant impact of these factors.

RR: relative risk; Hb: hemoglobin

**Supplementary figure** The change of colonoscopy IC rate in relation to the calendar year of index colonoscopy in Taiwanese Nationwide screening program

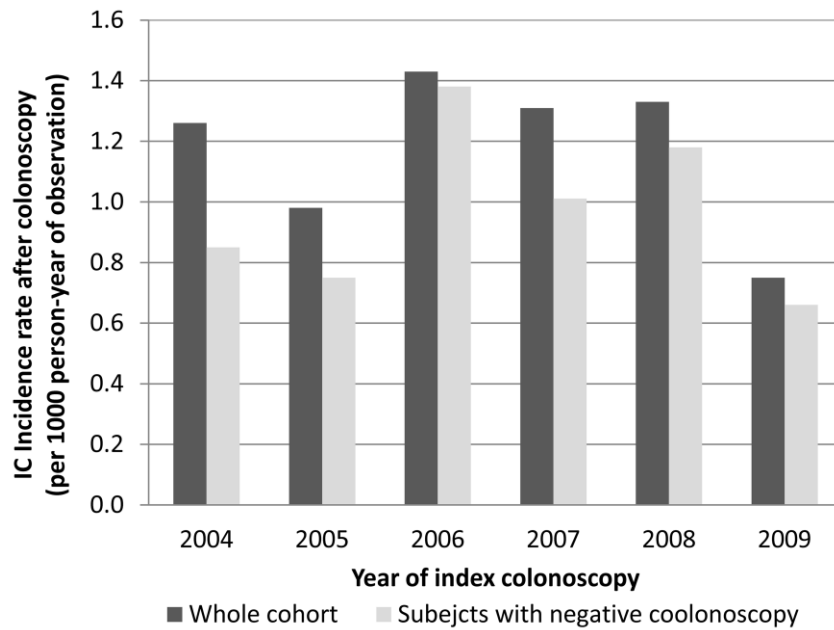

Supplement: gutjnl-2015-310256supp.pdf [file gutjnl-2015-310256supp.pdf]
